# Supplementary material for: Diversification into novel habitats in the Africa clade of Dioscorea (Dioscoreaceae): erect habit and elephant’s foot tubers
Source: PubMed Central journal article supplement (PMC5100304; doi:10.1186/s12862-016-0812-z), 2016-11-08

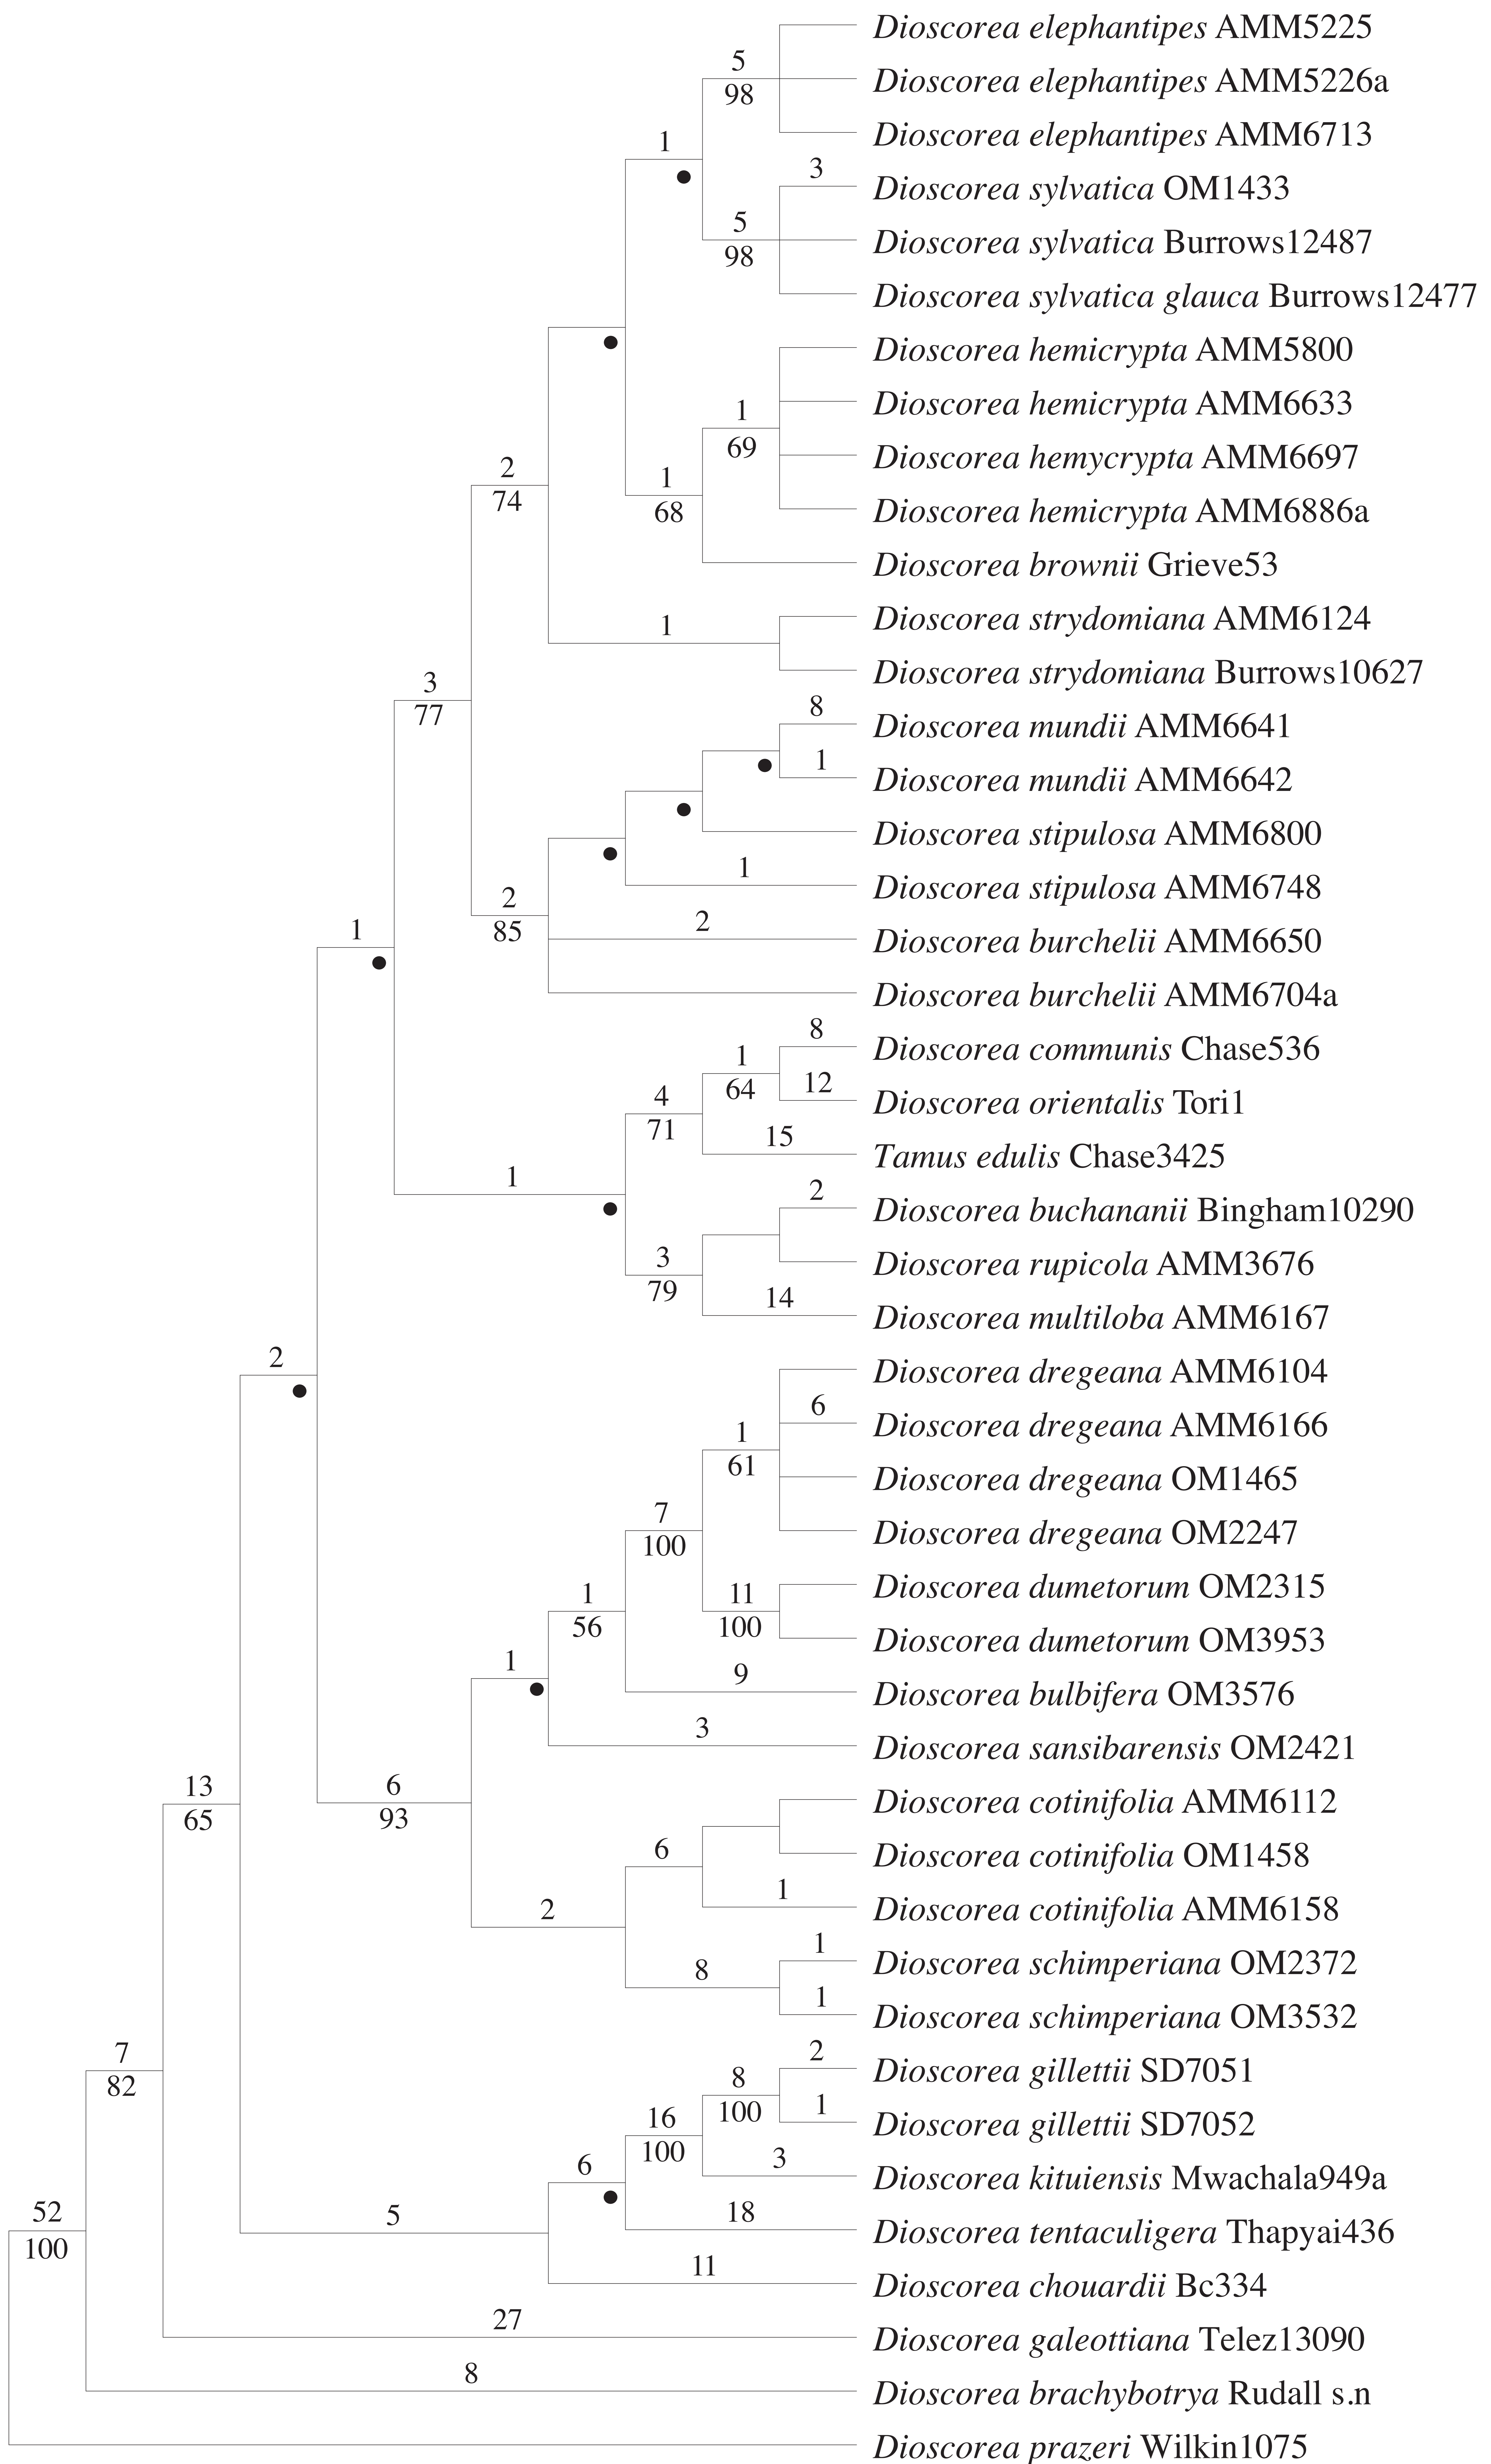

Supplement: 12862_2016_812_MOESM6_ESM.pdf [file 12862_2016_812_MOESM6_ESM.pdf]
